# Supplementary material for: Complete depletion of primordial germ cells in an All-female fish leads to Sex-biased gene expression alteration and sterile All-male occurrence
Source: PubMed Central journal article supplement (PMC4652418; doi:10.1186/s12864-015-2130-z), 2015-11-18
Supplement: 12864_2015_2130_MOESM1_ESM.pdf [file 12864_2015_2130_MOESM1_ESM.pdf]

10 20 30 40 50 60 70 80 90 100 110  
Carassius gibelio  
Carassius auratus  
Danio rerio  
Misgurnus anguillicaudatus  
Salmo salar  
Oncorhynchus mykiss  
Oryzias latipes  
Oreochromis niloticus  
Homo sapiens  
Xenopus laevis  
Gallus gallus  
Mus musculus

120 130 140 150 160 170 180 190 200 210 220  
Carassius gibelio  
Carassius auratus  
Danio rerio  
Misgurnus anguillicaudatus  
Salmo salar  
Oncorhynchus mykiss  
Oryzias latipes  
Oreochromis niloticus  
Homo sapiens  
Xenopus laevis  
Gallus gallus  
Mus musculus

230 240 250 260 270 280 290 300 310 320 330  
Carassius gibelio  
Carassius auratus  
Danio rerio  
Misgurnus anguillicaudatus  
Salmo salar  
Oncorhynchus mykiss  
Oryzias latipes  
Oreochromis niloticus  
Homo sapiens  
Xenopus laevis  
Gallus gallus  
Mus musculus

340 350 360 370 380 390 400 410 420 430 Identity  
Carassius gibelio  
Carassius auratus  
Danio rerio  
Misgurnus anguillicaudatus  
Salmo salar  
Oncorhynchus mykiss  
Oryzias latipes  
Oreochromis niloticus  
Homo sapiens  
Xenopus laevis  
Gallus gallus  
Mus musculus
