# Supplementary material for: Complete depletion of primordial germ cells in an All-female fish leads to Sex-biased gene expression alteration and sterile All-male occurrence
Source: PubMed Central journal article supplement (PMC4652418; doi:10.1186/s12864-015-2130-z), 2015-11-18
Supplement: 12864_2015_2130_MOESM3_ESM.pdf [file 12864_2015_2130_MOESM3_ESM.pdf]

|                | Total No. of embryos | Survival embryos | Embryos without PGCs | Embryos with normal PGCs |
|----------------|----------------------|------------------|----------------------|--------------------------|
| WT             | 150                  | 138              | 0                    | 138                      |
| con-MO         | 150                  | 130              | 0                    | 130                      |
| <i>dnd</i> -MO | 150                  | 133              | 132                  | 1                        |
