# Supplementary material for: Complete depletion of primordial germ cells in an All-female fish leads to Sex-biased gene expression alteration and sterile All-male occurrence
Source: PubMed Central journal article supplement (PMC4652418; doi:10.1186/s12864-015-2130-z), 2015-11-18

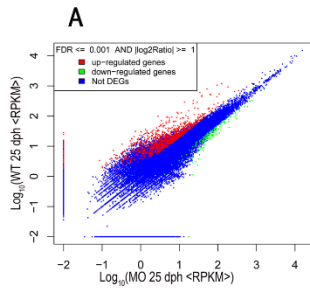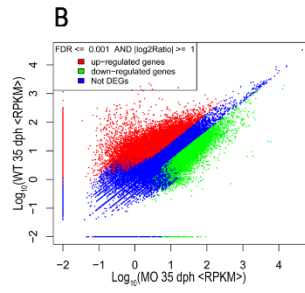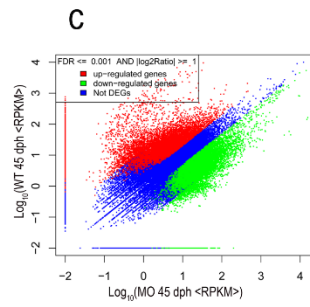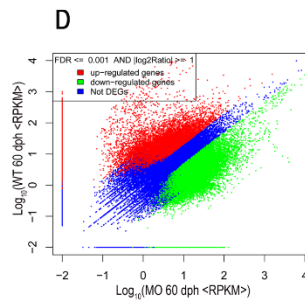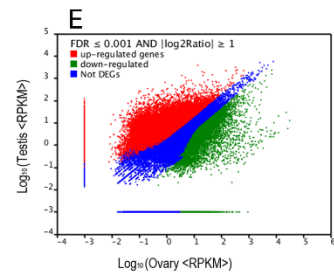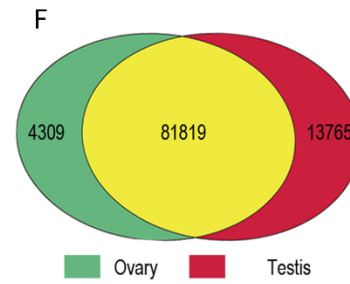

Supplement: 12864_2015_2130_MOESM4_ESM.pdf [file 12864_2015_2130_MOESM4_ESM.pdf]
