# Supplementary material for: Complete depletion of primordial germ cells in an All-female fish leads to Sex-biased gene expression alteration and sterile All-male occurrence
Source: PubMed Central journal article supplement (PMC4652418; doi:10.1186/s12864-015-2130-z), 2015-11-18
Supplement: 12864_2015_2130_MOESM8_ESM.pdf [file 12864_2015_2130_MOESM8_ESM.pdf]

|                | Total number | Body shape |     |                 |       | Pearl organs |
|----------------|--------------|------------|-----|-----------------|-------|--------------|
|                |              | slender    | fat | anus<br>prolate | round |              |
| WT             | 90           | 0          | 90  | 0               | 90    | 0            |
| <i>dnd</i> -MO | 85           | 84         | 1*  | 84              | 1*    | 84           |
