# Supplementary material for: Complete depletion of primordial germ cells in an All-female fish leads to Sex-biased gene expression alteration and sterile All-male occurrence
Source: PubMed Central journal article supplement (PMC4652418; doi:10.1186/s12864-015-2130-z), 2015-11-18
Supplement: 12864_2015_2130_MOESM9_ESM.pdf [file 12864_2015_2130_MOESM9_ESM.pdf]

| Gene            | Direction | Primer sequences (5'-3') |
|-----------------|-----------|--------------------------|
| <i>Vasa</i>     | Forward   | GGGAAGGCAAACAATGAAGA     |
|                 | Reverse   | CTTGGCCTTCATCTTTCCAA     |
| <i>Dmrt1</i>    | Forward   | GAAATGGTCGCTATAACGTG     |
|                 | Reverse   | GATGATGGAGTCGACAGAGA     |
| <i>Foxl2</i>    | Forward   | ACATTAAGCTGCACAGAAACTA   |
|                 | Reverse   | GAGGTAGTGTCCATGAGTATC    |
| <i>Amh</i>      | Forward   | GCCGGTTTTAGTTTTCAAC      |
|                 | Reverse   | AAAGAGACGATTTTTGCAC      |
| <i>Cyp19a1a</i> | Forward   | AACTCTCCAGAATGTGTAACCTG  |
|                 | Reverse   | TCCAGACACTCTCTATCAGTC    |
| <i>Cyp17a</i>   | Forward   | ACCATCACCCCTCCTCGTTCA    |
|                 | Reverse   | CACAATAAGAGAAGTTCTGA     |
| <i>Hsd3b</i>    | Forward   | AAAAGCTGGTCAGGCTGTTG     |
|                 | Reverse   | AGACAGGAGGAGTAAGGGGT     |
| <i>Hsd11b2</i>  | Forward   | TGTTTCATCACGCCTTACCCT    |
|                 | Reverse   | CATGGCTCCAATCATGACG      |
| <i>Hsd17b1</i>  | Forward   | CTGCTGACTTTGGCTCTGTG     |
|                 | Reverse   | AGAGCAGTAGTCACCCAACC     |
| <i>Sox9a</i>    | Forward   | GAGGAAATCAGTGAAGAACG     |
|                 | Reverse   | CTGAGACTGACCTGAGTGGT     |
| $\beta$ -actin  | Forward   | CGAGCTGTCTTCCCATCCA      |
|                 | Reverse   | CCAACGTAGCTGTCTTTCTG     |
| <i>Dnd</i>      | Forward   | GAACTTCAGTGGGCAGAACC     |
|                 | Reverse   | GTCAGAGATCATTTCGCAGCA    |
| <i>H2af1o</i>   | Forward   | TATGTCCGGTCGCGGTAAGAA    |
|                 | Reverse   | AGTCCAGTGCACGAGCGGAGT    |
| <i>Zp3</i>      | Forward   | TGACGCTCTCCACAAATCCT     |
|                 | Reverse   | ACCATTACAGGACCGAGCAA     |
| <i>Gdf9</i>     | Forward   | GGTCTCAGGAGCAGCTGCTG     |
|                 | Reverse   | GCTTGGATGAGAGGATGGA      |
| <i>Wt1a</i>     | Forward   | AGTCCACAACAGGCCCTAAT     |
|                 | Reverse   | TGGTCAGACAGCATGGATGT     |
| <i>Sox19b</i>   | Forward   | AAATGTTGCCGTTTCAGCCT     |
|                 | Reverse   | ATCACTGGTCATGGCAGTCA     |
| <i>Rpl13a</i>   | Forward   | TCTGGAGGACTGTAAGAGGTATGC |
|                 | Reverse   | AGACGCACAATCTTGAGAGCAG   |
